# Supplementary material for: Improved Progression-Free Survival in Irinotecan-Treated Metastatic Colorectal Cancer Patients Carrying the HNF1A Coding Variant p.I27L
Source: PubMed Central journal article supplement (PMC5641335; doi:10.3389/fphar.2017.00712), 2017-10-10
Supplement: Table_1.pdf [file Table_1.pdf]

# **Improved progression-free survival in irinotecan-treated metastatic colorectal cancer patients carrying the HNF1A coding variant p.I27L**

Adrien Labriet<sup>1,2†</sup>, Elena De Mattia<sup>3†</sup>, Erika Cecchin<sup>3</sup>, Éric Lévesque<sup>4,5</sup>, Derek Jonker<sup>6</sup>, Félix Couture<sup>4,5</sup>, Angela Buonadonna<sup>7</sup>, Mario D'Andrea<sup>8</sup>, Lyne Villeneuve<sup>1,2</sup>, Giuseppe Toffoli<sup>3</sup> and Chantal Guillemette<sup>1,2\*</sup>

\*Corresponding Author: Chantal Guillemette, Ph.D., CHU de Québec Research Center, R4701.5, 2705 Blvd. Laurier, Québec, Canada, G1V 4G2. E-mail: [chantal.guillemette@crchudequebec.ulaval.ca](mailto:chantal.guillemette@crchudequebec.ulaval.ca)

**Supplementary Tables**

## Supplementary Tables

**Supplementary Table 1.** *HNF1A* haplotype-tagging single nucleotide polymorphisms (htSNPs) in moderate to weak linkage disequilibrium ( $r^2 < 0.8$ ), and their corresponding associated SNPs ( $r^2 > 0.8$ ) as determined with the data of 1000 Genomes Phase 3 for the CEU population (European descent).

| htSNPs     | Associated SNPs |            |             |           |            |
|------------|-----------------|------------|-------------|-----------|------------|
| rs2244608  | rs1169288       | rs2243458  | rs142632970 | rs7954039 | rs2178463  |
|            | rs1169284       | rs3830659  | rs2243616   | rs6489786 | rs2650000  |
|            | rs1183910       | rs1169294  | rs2251468   | rs1732391 | rs11065359 |
|            | rs11065384      | rs11065358 | rs71076693  | rs2701175 | rs1696359  |
|            | rs11065385      | rs1169292  | rs7954331   | rs2701194 |            |
| rs1169286  | -               |            |             |           |            |
| rs2393791  | rs9738226       | rs7979478  | rs7139079   |           |            |
|            | rs2393776       | rs7979473  | rs7135337   |           |            |
|            | rs7970695       | rs7310409  | rs7953249   |           |            |
|            | rs2393775       | rs1169289  | rs11065365  |           |            |
|            | rs546442868     | rs2464190  |             |           |            |
| rs12427353 | rs34565150      | rs67075643 | rs71453526  |           |            |
|            | rs148285095     | rs12425790 | rs112508908 |           |            |
|            | rs5801412       | rs7131696  | rs7965349   |           |            |
|            | rs55834942      | rs7957197  |             |           |            |
|            | rs55879344      | rs61953352 |             |           |            |
| rs2071190  | -               |            |             |           |            |
| rs1169302  | rs1169299       |            |             |           |            |
| rs2259820  | rs2464196       | rs2257764  | rs2264778   |           |            |
|            | rs1169301       | rs2264750  | rs2258287   |           |            |
|            | rs1169300       | rs1182933  | rs1169281   |           |            |
|            | rs1169314       | rs3213545  | rs1169279   |           |            |
|            | rs1169315       | rs1169291  |             |           |            |
| rs1169307  | rs2257813       |            |             |           |            |
|            | rs2264779       |            |             |           |            |
| rs735396   | rs1169309       | rs2259816  | rs2257962   |           |            |
|            | rs1169306       | rs2464195  | rs2254971   |           |            |

|           |             |             |             |            |
|-----------|-------------|-------------|-------------|------------|
|           | rs1169310   | rs2259852   | rs4278584   |            |
|           | rs1169311   | rs34521980  |             |            |
|           | rs1169312   | rs2264782   |             |            |
| rs1882149 | rs41279096  | rs2393777   | rs73228105  | rs7303401  |
|           | rs56383076  | rs201044504 | rs7961178   | rs7132164  |
|           | rs2393774   | rs73228108  | rs2251556   | rs73226290 |
|           | rs55691424  | rs55956549  | rs73226296  | rs73226268 |
|           | rs73214155  | rs2254779   | rs7135458   |            |
| rs3999413 | rs1169304   | rs1169280   | rs12811390  |            |
|           | rs3999412   | rs2259697   |             |            |
|           | rs10849828  | rs12819210  |             |            |
|           | rs11065393  | rs535217845 |             |            |
|           | rs2258227   | rs11065403  |             |            |
| rs1169303 | rs2258043   |             |             |            |
|           | rs2701180   |             |             |            |
| rs1169293 | rs2245407   | rs1971317   | rs12313339  |            |
|           | rs113154140 | rs73226270  | rs113277649 |            |
|           | rs959400    | rs1696360   | rs2708086   |            |
|           | rs73226274  | rs570954040 |             |            |
|           | rs9919745   | rs1617471   |             |            |

Abbreviations: htSNP, haplotype-tagging SNP; SNP, single nucleotide polymorphism.

Associated SNPs are polymorphisms in strong linkage with the htSNP with  $r^2 > 0.8$ , as determined with the data of 1000Genomes Phase 3 for the CEU population.

**Supplementary Table 2.** Association between *HNF1A* htSNPs and severe neutropenia in the Canadian cohort. None of the htSNPs were significant in the Italian cohort using the same genetic model.

| htSNPs        | Model     | OR <sup>a</sup> (95% CI); P-value |
|---------------|-----------|-----------------------------------|
| rs1169286T>C  | Dominant  | 0.45 (0.19 - 1.07); 0.070         |
| rs2393791T>C  | Dominant  | 0.45 (0.20 - 1.04); 0.061         |
| rs12427353G>C | Recessive | 8.58 (1.30 - 56.57); 0.025        |
| rs2071190T>A  | Recessive | 2.70 (0.85 – 8.51); 0.091         |
| rs1169302T>G  | Dominant  | 0.48 (0.21 - 1.11); 0.085         |
| rs2259820C>T  | Dominant  | 0.32 (0.13 - 0.78); 0.012         |
| rs1169303A>C  | Dominant  | 0.35 (0.15 - 0.84); 0.018         |
| rs1169307C>T  | Recessive | 3.38 (1.31 - 8.73); 0.012         |

<sup>a</sup>Adjusted for age and co-treatment. Base changes are given for the + strand. Abbreviations: 95% CI, 95% confidence interval; OR, odds ratio; htSNP, haplotype-tagging single nucleotide polymorphism.

**Supplementary Table 3.** Association between *HNF1A* htSNPs and overall survival and response rate in the Italian cohort. None of the htSNPs were significant in the Canadian cohort for these endpoints using the same genetic model.

| <b>Overall survival</b> | <b>Model</b> | <b>HR<sup>a</sup> (95% CI); P-value</b> |
|-------------------------|--------------|-----------------------------------------|
| rs2393791T>C            | Dominant     | 0.61 (0.42 – 0.88); 0.008               |
| rs1169302T>G            | Recessive    | 1.78 (1.13 – 2.79); 0.013               |
| rs1169307C>T            | Recessive    | 1.69 (1.07 – 2.67); 0.026               |
| <b>Response rate</b>    | <b>Model</b> | <b>OR<sup>a</sup> (95% CI); P-value</b> |
| rs12427353G>C           | Dominant     | 0.20 (0.05 – 0.78); 0.020               |

<sup>a</sup>Adjusted for gender, age, cancer site, stage at diagnosis, radical surgery and adjuvant chemotherapy. Base changes are given for the + strand. Abbreviations: 95% CI, 95% confidence interval; HR, hazard ratio; htSNP, haplotype-tagging single nucleotide polymorphism; OR, odds ratio.

**Supplementary Table 4.** Sequences of primers used for *in vitro* studies.

| <b>Primers</b>                                                                | <b>Sequence (5' → 3')</b>          |
|-------------------------------------------------------------------------------|------------------------------------|
| <i>HNF1A</i> -EcoRI-forward<br>(PCR and cloning of <i>HNF1A</i> ORF)          | CTAGCTGGAATTCCCATGGAGCAAAAGCTCATT  |
| <i>HNF1A</i> -EcoRV-reverse<br>(PCR and cloning of <i>HNF1A</i> ORF)          | CTAGCTGGATATCCCCAAGCAGGCAGTACAGG   |
| <i>rs1169288A</i> -forward<br>(site directed mutagenesis)                     | AGAGGCACTGaTCCAGGCACT              |
| <i>rs1169288A</i> -reverse<br>(site directed mutagenesis)                     | TTGCTCAGCCCTGACTCC                 |
| <i>rs2464196G</i> -forward<br>(site directed mutagenesis)                     | GTGACCCAGAgCCCCTTCATG              |
| <i>rs2464196G</i> -reverse<br>(site directed mutagenesis)                     | ATGGCTCTGCACAGGTGG                 |
| prom <i>ABCC1</i> -Sac-forward<br>(PCR and cloning of <i>ABCC1</i> promoter)  | CTAGCTGGAGCTCGCACTGAGATTACATGCGTGA |
| prom <i>ABCC1</i> -Xho1-reverse<br>(PCR and cloning of <i>ABCC1</i> promoter) | CTAGCTGCTCGAGCCCAGATCCTCCAAGGCTTA  |
